# Supplementary material
Source: HighWire-hosted journal article supplement (http://www.jrheum.org/highwire/filestream/29785/field_highwire_adjunct_files/0/150430_Data_Suppl.pdf)

**Supplementary Figure 1.** JIA ACR response rates and inactive disease status (OC data; mITT) over time. JIA: juvenile idiopathic arthritis; ACR: American College of Rheumatology; OC: observed cases; mITT: modified intention to treat.

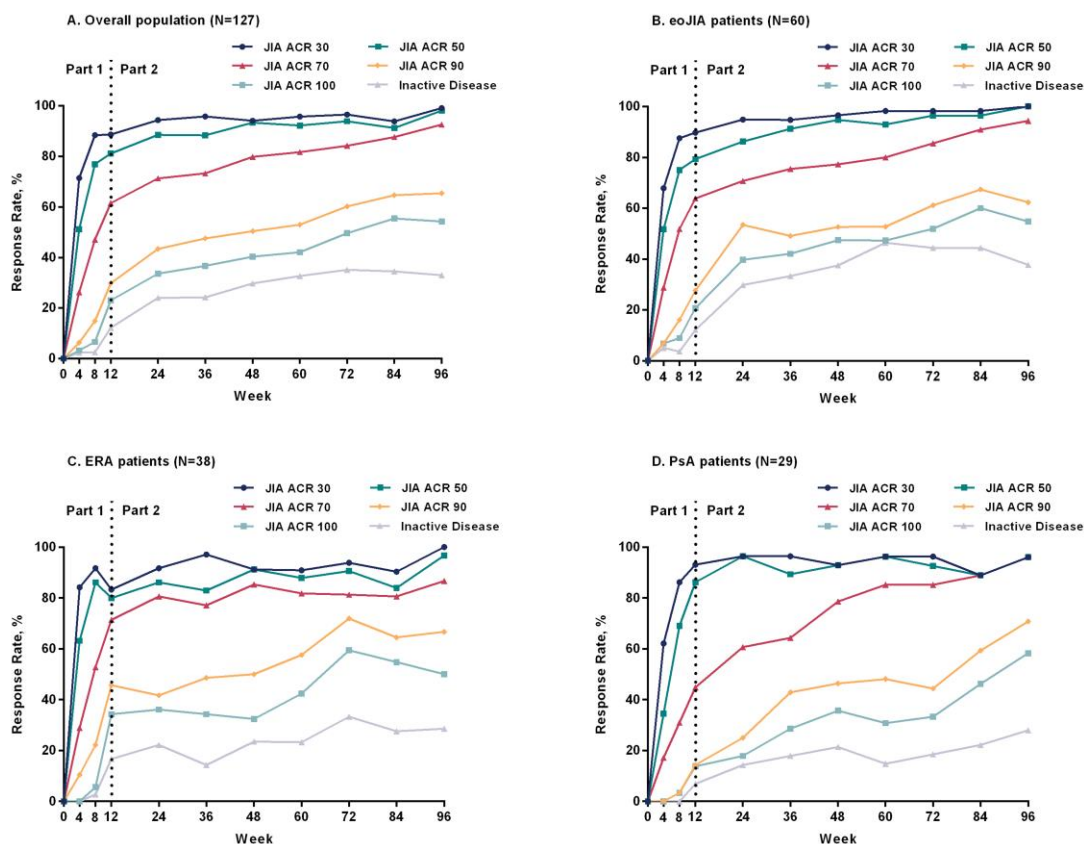

**Supplementary Figure 2.** JIA ACR response rates (LOCF data; mITT) over time. JIA: juvenile idiopathic arthritis; ACR: American College of Rheumatology; LOCF: last observation carried forward; mITT: modified intention to treat.

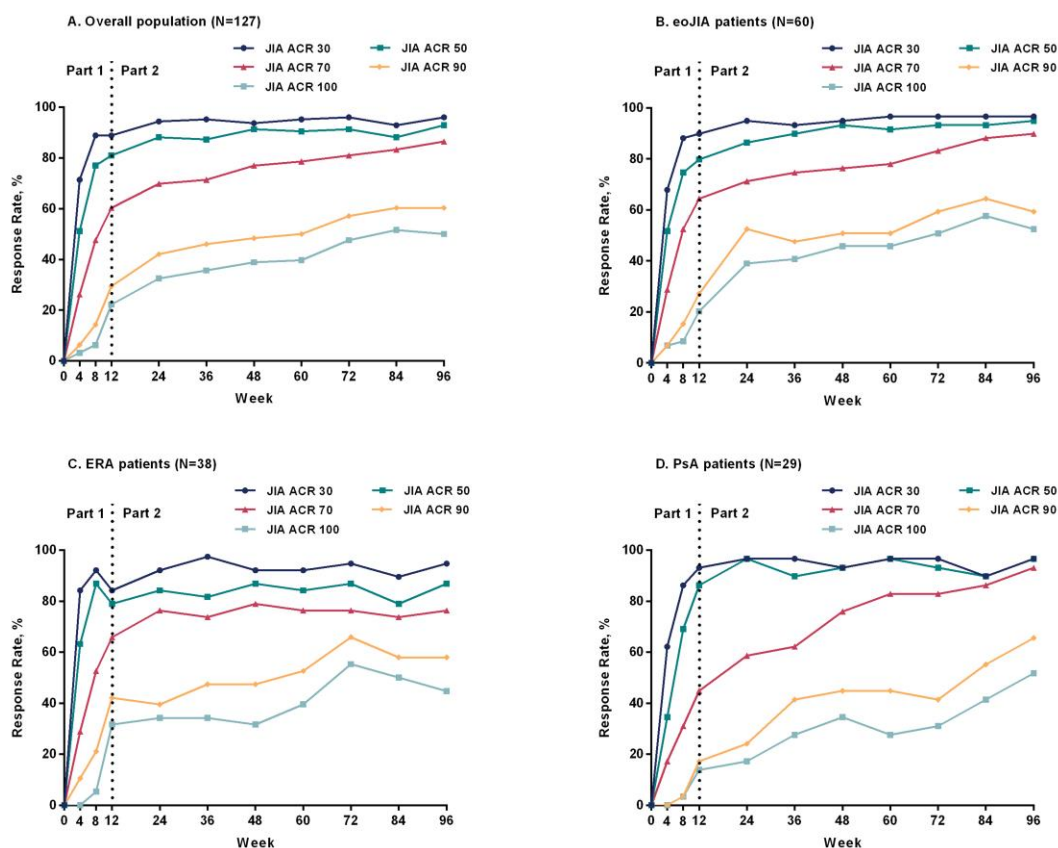

Supplement: 150430_Data_Suppl.pdf [file 150430_Data_Suppl.pdf]
